# Supplementary material
Source: PubMed Central journal article supplement (PMC3730760)

SUPPL. FIG 1 Clark and Krishnan, *et al.* UPVISPF  
 S SPVLP1FIGF1T (LP12IGd11) VPU 2 GF 17 1F

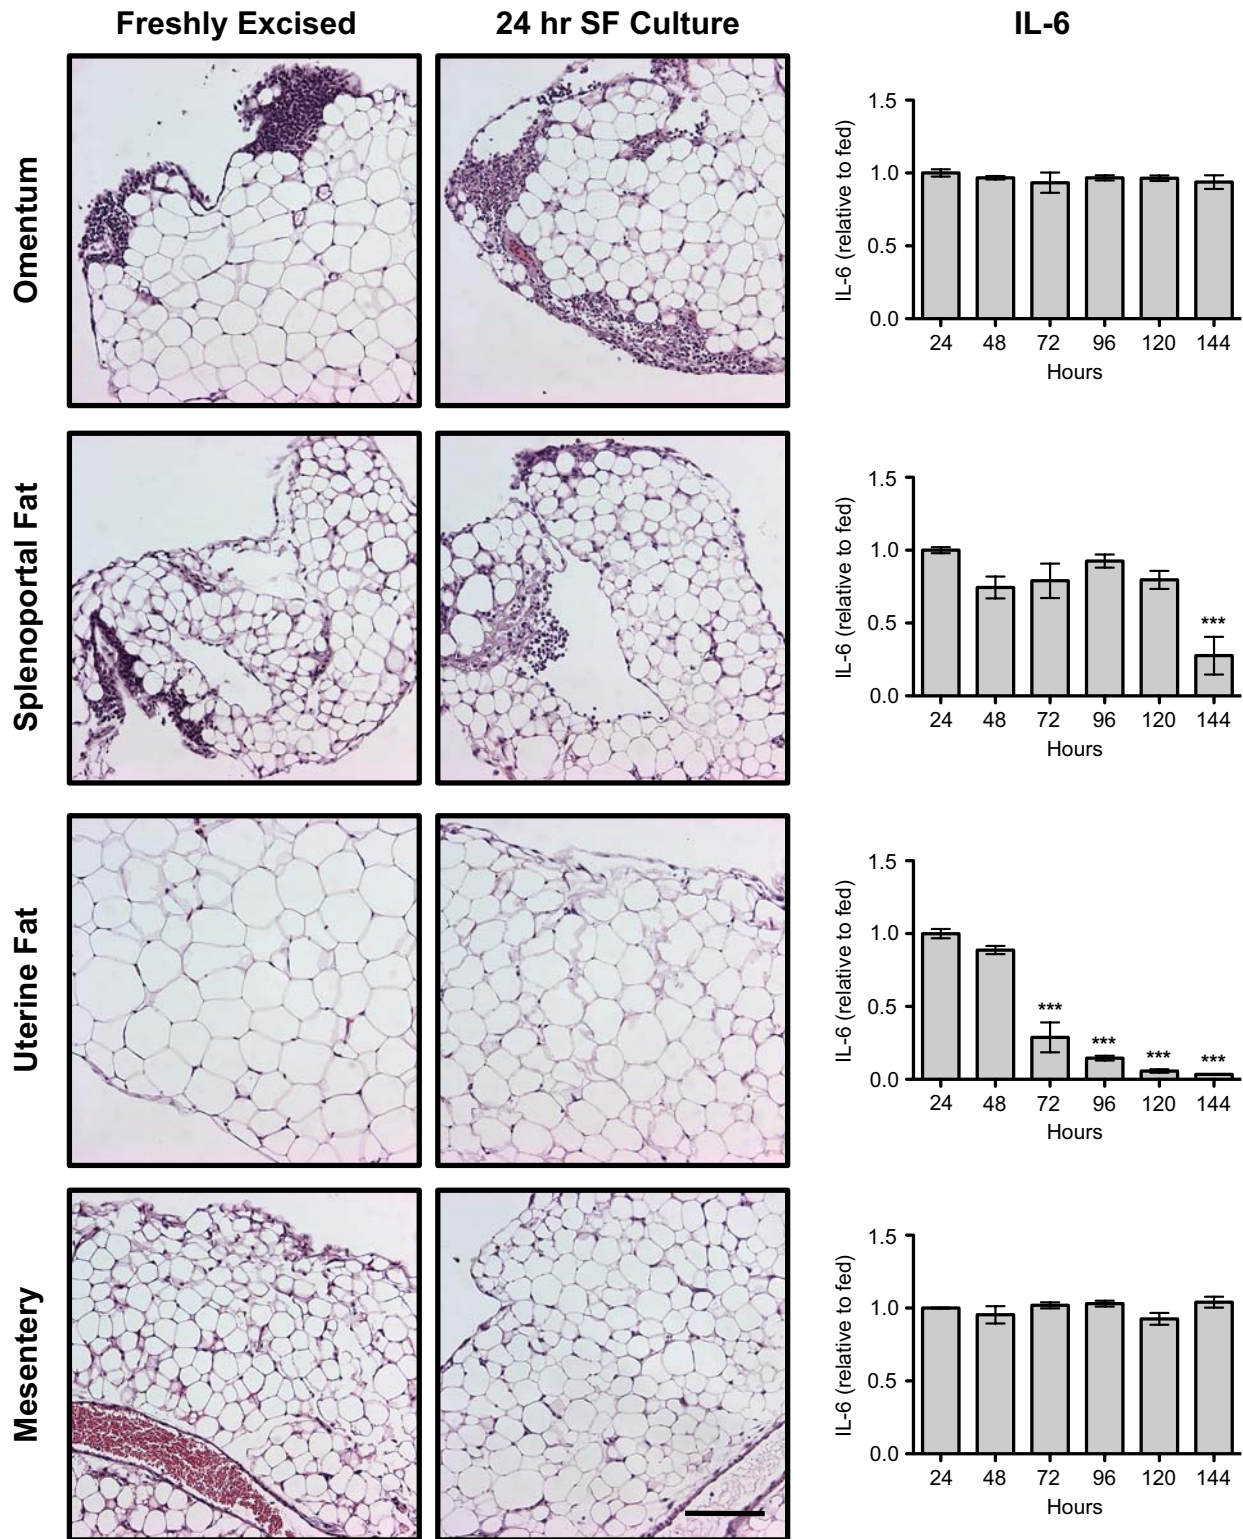

Supplement: mmc1.pdf [file mmc1.pdf]

SUPP FIG 2 Clark and Krishnan, *et al.* UPVISPG  
S SPV PI G-2G6C aV PI 2-2K66s VPU 2 2G1 7 I G

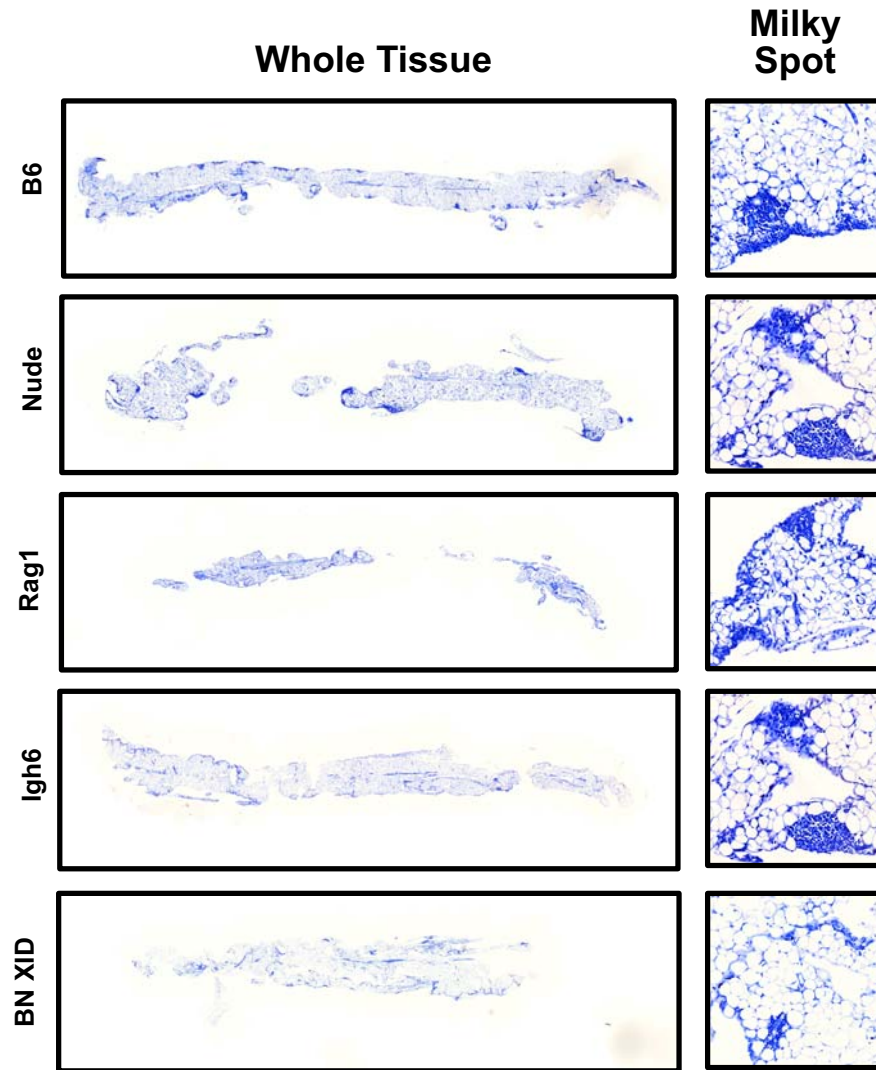

Supplement: mmc2.pdf [file mmc2.pdf]
